1       **Sensory discrimination by isolated feeding tentacles in**  
2                                       *Sanderia malayensis*

3  
4                                       Kazuo Mori<sup>1</sup>, Matthew Sullivan<sup>2</sup> and Joseph Ayers<sup>3</sup>,  
5                                       Northeastern University  
6                                       Marine Science Center  
7                                       East Point, Nahant, MA 01908

8  
9                                       **Key Words:** Scyphomedusae, Tentacle,  
10                                      Sensory Discrimination, Reflex, Nerve Net

- 11  
12                                      1. Kazuo Mori. Okinawa Institute of Science and Technology. 1919-1 Tancha, Onna-son,  
13                                      Kunigami-Gun Okinawa, Japan 904-0495  
14                                      2. Matthew Sullivan. Schlumberger-Doll Research. 1 Hampshire St. Cambridge, MA  
15                                      02139 USA  
16                                      3. Author for correspondence: [lobster@neu.edu](mailto:lobster@neu.edu)  
17

## 18 **Summary Statement**

19 Two separate reflexes have been distinguished isolated tentacles of the  
20 scyphomedusa, *Sanderia malayensis*, a bi-directional network for withdrawal and a  
21 proximally directed network for feeding.

22

## 23 **Abstract**

24 Despite having only a diffuse neural network, tentacles of scyphomedusae exhibit a  
25 variety of distinct behavioral acts. One such behavior in tentacles is the capture and  
26 subsequent transfer of prey to the mouth. Interaction with prey consists of a variety of  
27 distinct stimuli—mechanical contact with the organism, chemical stimulation from the  
28 prey, and once captured by the tentacle, the weight of the food particles stretching the  
29 tentacle. By isolating and observing these individual stimuli in intact and isolated  
30 tentacles of the scyphomedusa, *Sanderia malayensis*, two separate reflexes have been  
31 distinguished. The tentacle feeding response observations suggest that the tentacle has  
32 two sensing networks, a bi-directional network for withdrawal and a proximally directed  
33 network for feeding.

34

## 35 **Introduction**

36 Jellyfish medusae perform a number of distinct behavioral acts, such as rhythmic  
37 swimming and food capture (Romanes 1880, Horridge 1953, Passano 1965). Two groups  
38 of jellyfish, hydromedusae and cubomedusa, those behaviors are controlled by their  
39 central nervous systems and peripheral neural net. Hydromedusae have a central nervous  
40 system that consists of two nerve rings to process sensory inputs and generate rhythms  
41 (Horridge 1955). The important neural elements for swim control in these animals are  
42 found in one of these nerve rings, the inner nerve ring. The *Aglantha digitale* produces an  
43 escape swimming response, in addition to slow spontaneous swimming contraction of the  
44 bell. Mackie and Meech (Mackie and Meech 1985) found that the motor giant neurons  
45 are able to produce two different types of spikes for these behaviors. They related  
46 different input events to discrete neural sub-systems. A comprehensive picture of the  
47 neuronal circuit was constructed by studying the synaptic inputs into the giant axons  
48 using extracellular recordings of the nerve rings in response to different stimuli (Mackie  
49 and Meech 1995, Mackie and Meech 1995, Mackie and Meech 2000, Mackie, Marx et al.  
50 2003). Cubomedusae also have a central nervous system consists of the nerve ring and  
51 rhopalia those contain image forming eyes with lenses. A nerve ring connects (Garm,  
52 Ekstrom et al. 2006). Box jellyfishes, *Tripedalia cystophora* and *Chiropesella bronzie*,  
53 shows visually guided behavior suggesting that the CNS of these jellyfishes integrates  
54 visual information and innervate motor systems (Garm, O'Connor et al. 2007).

55 Recent studies on the Hydromedusae have used calcium imaging of genetically  
56 engineered Hydra to record the activity of all neurons (Dupre and Yuste 2017). They  
57 established that there are three distinct functional neuronal networks that mediate at least  
58 4 different behavioral acts that have been established previously (Trembley 1744, Haug  
59 1933, Ewer and Munro Fox 1947, Passano and McCullough 1963, Lasker, Syron et al.  
60 1982).

61 A central nervous system or nerve rings on scyphomedusae have not been  
62 reported, but they exhibit swimming and feeding behavior similar to hydromedusae and  
63 cubomedusae that have a CNS. Pulsation rhythms are generated by any one of the

64 rhopalia located on the bell margin (Romanes 1885). Scyphomedusae usually have 8 or  
65 16 rhopalia and their pacemakers are responsible for initiating contractions. The rhythm  
66 of a rhopalium pacemaker can be reset by a current injection suggesting that an active  
67 pacemaker resets all others to avoid simultaneous initiations of bell contractions at  
68 different locations (Pantin and Dias 1952, Horridge 1959). There is no direct central axon  
69 tracts connecting rhopalia (Romanes 1885, Horridge 1954, Horridge 1956, Passano and  
70 McCullough 1963, Passano 2003), so signals are presumed to be conducted through the  
71 nerve net in the bell.

72 A rhopalium includes a statocyst, sensory epithelia, and ocelli (Schafer 1878,  
73 Martin 2002). The pacemaker is considered to be located in inner half of the rhopalium,  
74 however the exact location and circuitry of the pacemaker is unclear (Passano 1973,  
75 Nakanishi, Hartenstein et al. 2009). Rhopalia are connected to two kinds of nerve nets in  
76 the bell, the diffused nerve net (DNN) and the motor nerve net (MNN). Sensory inputs  
77 are sent to rhopalia through the DNN and an action potential from rhopalia that initiates  
78 bell contraction is transmitted to swimming muscles through the MNN (Romanes 1885,  
79 Horridge 1956). The DNN interacts with the MNN primarily at a rhopalium, and the  
80 DNN is also capable of enhancing MNN induced contractions (Romanes 1885, Horridge  
81 1956, Passano and McCullough 1965, Passano 1973).

82 With the diffused nerve nets and rhopalia, scyphomedusae integrate and respond to  
83 environmental information. Arai reported that the scyphomedusa *Aurelia aurita* are  
84 attracted toward prey with which they are not in direct contact (Arai 1992). This result  
85 suggests that their swimming behavior is modified to produce a taxis, however, the  
86 precise network which underlies this modification has yet to be identified.

87 Capturing prey is an important event that can influence the pulsation rhythm of the  
88 bell. Some medusae, such as *Aurelia aurita*, have a number of short, fine tentacles on the  
89 bell margin to catch zooplankton. Other medusae, such as *Chrysaora hysoscella*, have  
90 fewer, longer tentacles and they feed on both zooplankton and larger prey such as fishes  
91 and other jellyfish. *Chrysaora* captures prey on a tentacle, and tangles it by the swimming  
92 movement of the medusa (Larson 1986). The tentacle then rapidly contracts, pulling the  
93 attached prey upward to the bell, where contact is made with an oral arm.

94 The tentacle of *Chrysaora* is composed of four basic layers: an outer epithelial  
95 layer, a layer of muscle fiber, a noncellular layer, called the mesogleia, and an endodermal  
96 layer which encloses the gastric canal (Burnett and Sutton 1969). Muscles are juxtaposed  
97 to the mesogleia (Perkins, Ramsey et al. 1971). A tentacle of *Chrysaora* contracts to a  
98 thirtieth of its relaxed length when prey is attached. Most of the length contraction arises  
99 from muscles crumpling into the mesogleia, only a small portion stems from actual  
100 shortening of the muscles themselves (Burnett and Sutton 1969, Perkins, Ramsey et al.  
101 1971).

102 Anderson and co-workers (Anderson, Moosler et al. 1992) described  
103 immunohistochemically a nerve net in the outer epithelial layer of a *Chrysaora* tentacle.  
104 The region of nerve net stained on the subumbrella is considered a DNN (Anderson,  
105 Moosler et al. 1992), and it can be assumed that the stained nerve net would have a DNN  
106 like function. There might be another nerve net that is not immunoreactive to Antho-  
107 RFamide and innervates the motor system, like a MNN in the bell. Another nerve net has  
108 been stained in the endodermal layer; this would not innervate the motor system because  
109 mesogleia located between ectodermal and endodermal layers does not contain cells

110 (Burnett and Sutton 1969). An extremely dense immunoreactive nerve net, the tentacular  
111 nerve ring, can be found in the ectoderm at their base (Anderson, Moosler et al. 1992).

112 *Sanderia malayensis*, is a tropical scyphomedusae that is classified into the same  
113 family to *Chrysaora* (Hargitt 1910). *Sanderia* rhythmically contracts its tentacle to keep  
114 the position of captured prey until an oral arm makes contact and contracts to transport  
115 this prey to the mouth. This behavior persists in isolated tentacles. This kind of rhythmic  
116 contraction has not been investigated and understanding the mechanism would be helpful  
117 to investigate signal processing by the neural net. Similarly to hydra (Dupre and Yuste  
118 2017) it is possible to distinguish two different reflexes mediated by the neural net in  
119 isolated *Sanderia* tentacles. Through behavioral and electrophysiological experiments, we  
120 can distinguish individual sensory and motor components of these two tentacular  
121 responses of *Sanderia*.

122

## 123 **Materials and Methods**

124

### 125 **Animals**

126

127 Polyps of *Sanderia malayensis* were obtained from the New England Aquarium (Boston,  
128 MA, US). They were kept in circulating natural sea water at 22 °C. *Sanderia* polyps  
129 strobilated and released ephyrae at that temperature. *Sanderia* ephyrae were fed *Artemia*  
130 (Brine Shrimp Direct, UT, US) daily until their bell grew to 2 cm in diameter. Grown  
131 animals were fed chopped mussel or Aurelia every other day in addition to daily feedings  
132 of *Artemia*.

133

### 134 **Methods**

135

136 All experiments were performed in ambient filtered sea water. A tentacle was isolated  
137 from medusa having bell diameters that ranged from 3 cm to 10 cm. Isolated tentacles  
138 were placed in a specifically designed perfusion chamber, 37 cm in height, 8 cm in width,  
139 and 3.5 cm in depth (Fig. 1). To record electrical activities, two Teflon coated silver  
140 wires were inserted into the gastric cavity separated axially by 4mm. We placed the tip of  
141 the distal (longer) electrode about 1 cm from the cut end of the relaxed tentacle. After the  
142 cut end was tied with a string, the tentacle was moved into the chamber, and was  
143 suspended by these electrode wires. When we did not use electrodes, the tentacle was  
144 suspended by a metal wire.

145 The recorded signals were amplified using an A-M systems differential AC  
146 amplifier. Tentacle behaviors were recorded using a CCD camera (SONY, XC-77) and  
147 recorded simultaneously with physiological signals on the audio tracks of a (SONY, GV-  
148 HD700) to provide synchrony between the behavioral and electrophysiological  
149 components. Signals were digitized as Quicktime Movies or digitized using an analog to  
150 digital converter (National Instruments, NI 6221) and acquired and processed with  
151 LabView software (National Instruments).

152 For chemical stimuli, we made a mussel juice by homogenizing and filtering  
153 mussels. We diluted the juice with sea water in a decade series. Amino acid solutions of  
154 glutamic acid, glutathione, asparagine, glycine, proline, valine, cysteine,  
155 methylglutathione and glutamine were made using sea water in concentrations of  $10^{-2}$  M.

156 Lucifer yellow (0.02 %) was dissolved in each test solution to visualize the stimulus  
157 making contact with the tentacle in the video signal. For glutamic acid and glutathione  
158 that were found to induce a response,  $10^{-5}$ ,  $10^{-4}$ ,  $10^{-3}$ ,  $10^{-2}$ ,  $10^{-1}$  M solutions were  
159 prepared. During chemical stimulus experiments sea water was continuously fed into the  
160 perfusion chamber by gravity (Fig. 1). Sea water was drained from the bottom of the  
161 chamber and a vacuum aspiration was used to adjust the drain speed. Stimulus solutions  
162 were introduced into the chamber by temporarily switching the continuous flow of sea  
163 water to a flow of the stimulus solution.  
164

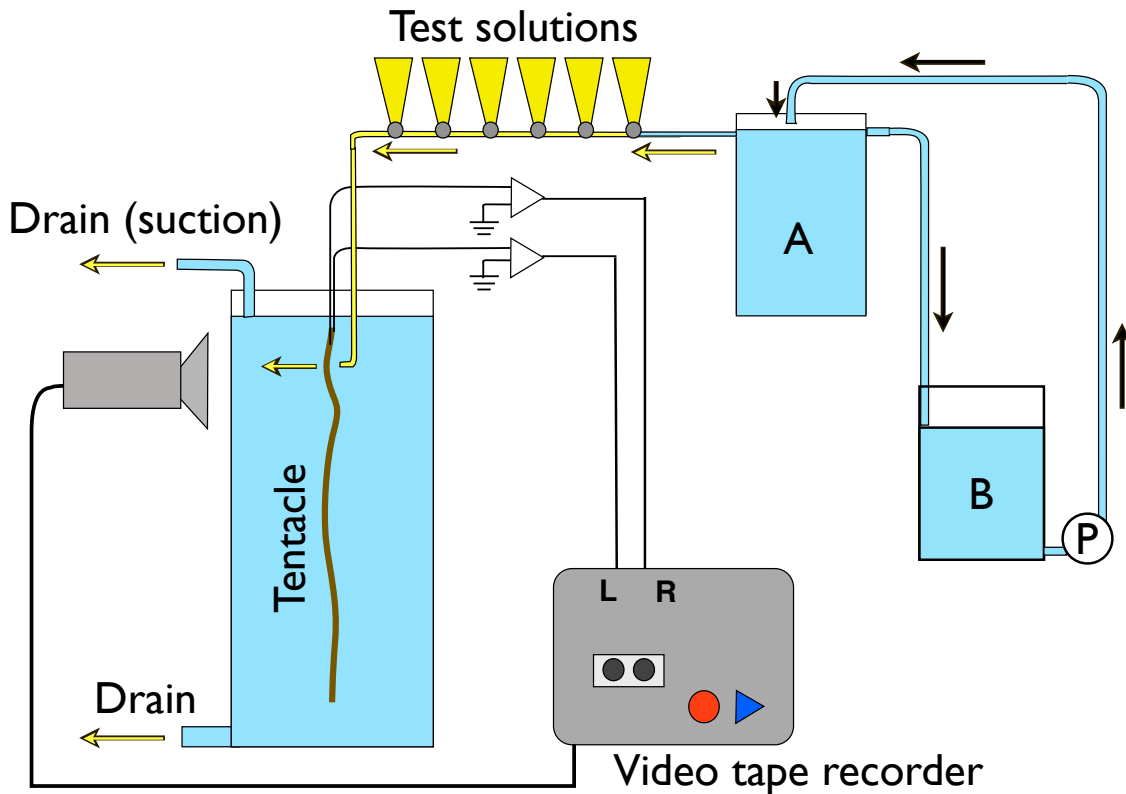

Fig. 1. A diagram of the experimental setup. An isolated tentacle was suspended in a perfusion chamber with two metal electrodes inserted into the gastric canal. A gravity driven flow of sea water was continuously fed into the perfusion chamber (yellow arrow) from a holding tank (A). Sea water in the chamber was drained from the bottom, and the height was adjusted with a suction aspirator from water surface. The maximum level of the holding tank (A) is set by a drain near the top, that removes water in above this level to a holding tank (B). To ensure that the level in (A) is constant, sea water is continuously pumped from (B) to (A) using a pump (P). Tubes for test solutions were connected to the perfusion tubing with three way valves. Tentacle behaviors and electrical activities were recorded using a CCD camera on a videocassette recorder.

165  
166 Mechanical stimulus was given using a glass rod with a heat polished tip. We  
167 applied mechanical stimuli in three ways; 1) a slow touch that did not move the tentacle,  
168 2) a quick touch, that resulted in tentacle motion, and 3) a rapid succession of quick  
169 touches.

170 In some experiments, tentacles were stretched by applying weight to the tentacle  
171 with square filter paper in sizes 2.5 mm, 5 mm, and 10 mm. The paper was introduced to

172 the tentacle in the chamber with a tweezers and touched until the filter paper adhered to  
173 the tentacle, presumably through the release and attachment of nematocysts. After  
174 confirming attachment, the paper was released and allowed to stretch the tentacle.

175 Tentacle position was analyzed by tracking the position of a fiduciary mark on the  
176 tentacle, either a food particle, a cluster of nematocytes, or the filter paper stimulus, using  
177 digitizing tools (Hedrick 2008) in Matlab (The Math Works).

## 178 **Results**

179

### 180 **1. Feeding response in *Sanderia malayensis***

181 In the absence of stimuli, *Sanderia* medusa tentacles are in a relaxed state, freely  
182 floating as the organism swims. If contact is made with a large piece of food, such as  
183 mussel flesh, nematocysts are fired, capturing the prey. The tentacle then undergoes an  
184 immediate and large contraction, bringing the captured food toward the bell. Smaller  
185 prey, such as *Artemia*, will be captured in a similar manner, but does not induce an  
186 immediate tentacular contraction, although several such small food items will sum to  
187 eventually induce contraction in the tentacle. Concurrent with contraction, an oral arm  
188 swings toward the tentacle to transfer this food to the mouth. The food is then transferred  
189 from the tentacle to the oral arm. This process can be slow and during transfer the  
190 tentacle is observed to relax slightly followed by a subsequent contraction to bring the  
191 food back near the oral arm. Only once the food has been transferred does the tentacle  
192 relax completely.

193

### 194 **2. Feeding response of isolated tentacles**

195 A proximal repetitive contraction is observed in an isolated tentacle in response to a  
196 food stimulus. Tentacles were isolated from animals, either with or without the  
197 tentacular nerve ring. The tentacle was mounted in a seawater chamber and was not  
198 observed to contract in the absence of external stimuli. When a piece of flesh, either from  
199 a mussel or from a moon jelly, was attached to the tentacle, a proximal contraction was  
200 initiated immediately from the point of contact (Fig. 2). After fully contracting,  
201 subsequent contractions kept the food particle near the same, contracted position. This  
202 behavior is similar to that observed in intact animals, where the tentacle moves the food  
203 to an oral arm. After 45 seconds and several repeated contractions the tentacle relaxed  
204 fully and the food returned to its initial position. This demonstrates that the feeding reflex  
205 is endogenous to the peripheral neural net. The durations of this feeding response, from  
206 the first contraction to the full relax condition, were varied between preparations ranging  
207 from a minute to more than 15 min.

208 Concurrent with behavioral observations, electrophysiological measurements were  
209 made during the feeding response. Two wires inserted into the gastric cavity were  
210 attached at the base of the tentacle and spaced approximately 4 mm. Action potentials  
211 were observed coincident with every contraction (Fig. 2). Response from the distal  
212 electrode always preceded response from the proximal electrode, indicating the signal  
213 was travelling up from the tentacle (Fig. 2 inset).

214

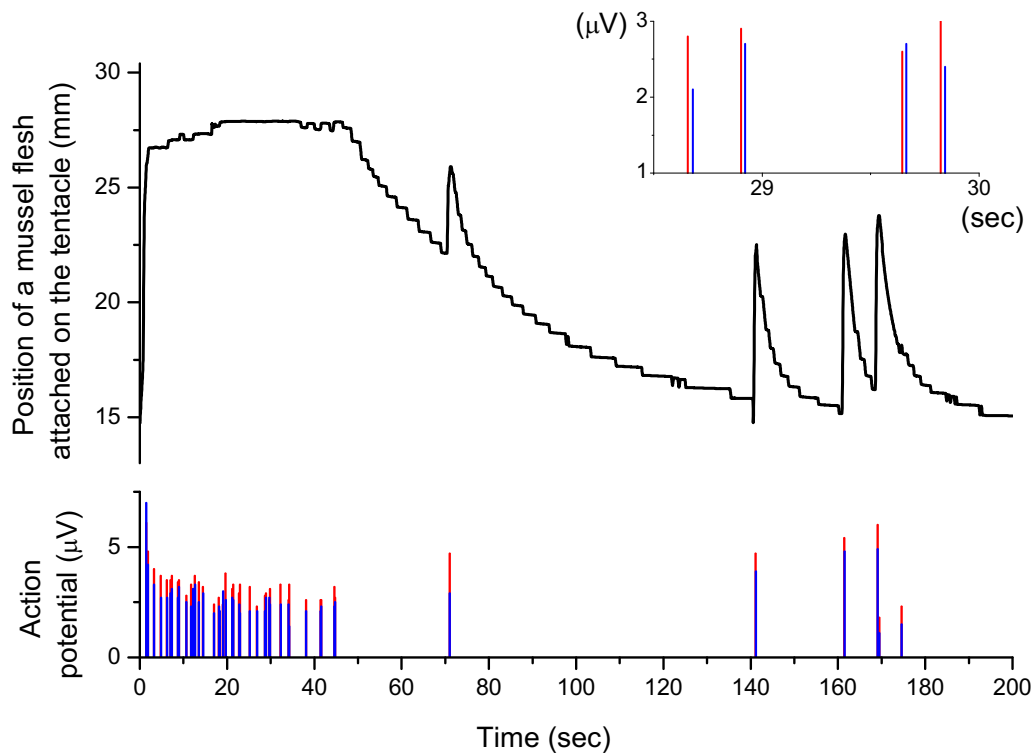

Fig. 2. Tentacle extension and electrophysiological recording of an intact tentacle in response to a piece of mussel flesh. The tentacle extension is obtained by tracking an attached piece of mussel. Blue and red bars are two action potentials recorded with distal and proximal electrodes inserted in the gastric cavity of the tentacle. When a piece of mussel flesh was attached, at  $t = 0$ , it contracted proximally and it repeated small contractions to maintain the food position. Both action potentials followed contractions. The inset shows enlarged action potentials between 28 to 30 seconds. These contractions were initiated at the stimulated point on the tentacle and conducted proximally.

215  
216

217 A tentacular nerve ring that is located at the base of tentacle and is an extremely dense  
218 nerve net has been reported in two species *Chrysaora* and *Cyanea* those are classified  
219 into different families (Anderson, Moosler et al. 1992). It is assumed that *Sanderia*,  
220 classified into the same family as *Chrysaora*, also has a tentacular nerve ring. The  
221 feeding responses were observed on both of the tentacles prepared with and without the  
222 base that is expected to contain a tentacular nerve ring. However, the response of  
223 tentacles attached to the tentacular nerve net was longer in duration than those of isolated  
224 tentacles. Figure 3 shows a comparison of response durations of the two preparations to  
225 moon jelly and mussel stimuli. The duration was obtained by measuring the time between  
226 the first contraction after the stimulus was applied and the last contraction before the  
227 tentacle relaxed. Because the results were varied on preparations between 10 sec and 200  
228 sec, the duration of the response an isolated tentacle was normalized with the duration of  
229 that of an intact tentacle isolated from the same animal. Then, the average was obtained  
230 with four experiments for each stimulus. Response durations of isolated tentacles were 25  
231 % shorter than intact tentacles for moon jelly stimulus, and were 50 % shorter for mussel

232 stimulus. This result suggests that the tentacular nerve ring may modulate the feeding  
233 response but is not necessary.

234

### 235 3. Feeding response to chemical stimuli

236 A food stimulus is complicated and can elicit many possible sensory reactions.  
237 Understanding the underlying sensory response requires simplifying the complicated  
238 food stimulus into component parts and understanding the isolated behavior of these  
239 responses. The chemical response is likely to be important for signaling the presence of  
240 food. The responses to two different chemical stimuli are studied, filtered juice from a  
241 homogenized mussel and solutions of amino acids.

242

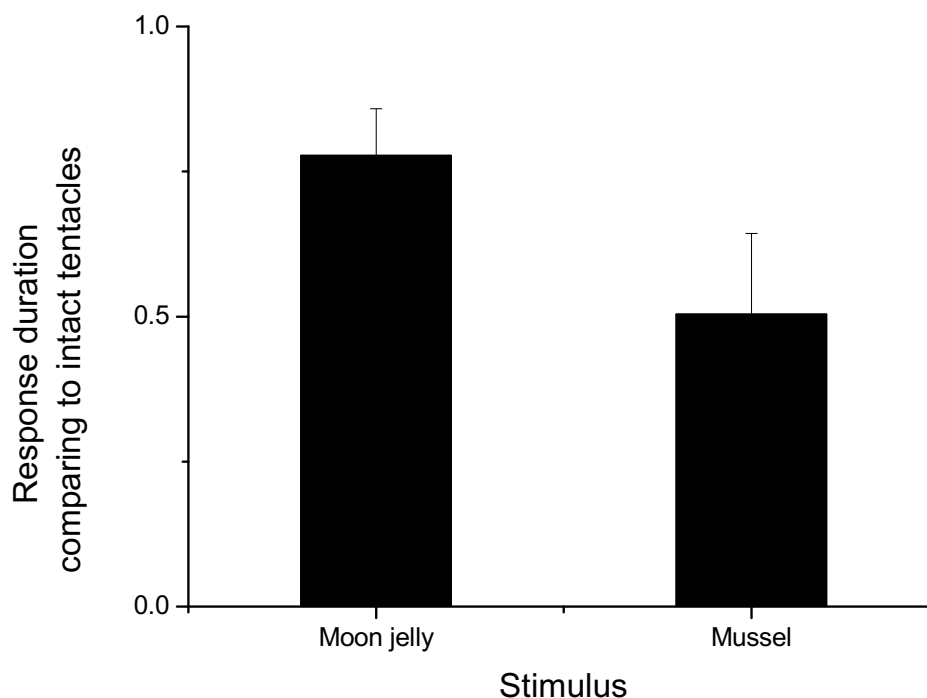

Fig. 3. Comparison of response durations of isolated tentacles and intact tentacles. The response durations of isolated tentacles to moon jelly and mussel flesh are normalized by those of intact tentacles containing a tentacular nerve ring obtained from the same animal. These results are obtained with four tentacles for each experiment. Response durations of isolated tentacles were 25 % shorter than intact tentacles to a moon jelly stimulus and 50 % shorter to a mussel stimulus. This indicates that tentacular nerve ring located at the base of tentacles modifies response, but is not necessary to induce a response.

243

244

245 To isolate chemical effects from mechanical ones, the chemicals are introduced to  
246 the tentacle through a constant stream of water flowing past the tentacle. A steady stream  
247 of fresh seawater is directed toward the tentacle under observation. There is no response  
248 observed to the stream of water itself. An experiment is performed by switching a valve  
249 upstream of the seawater outlet to inject a controlled amount of the chemical under test  
250 (200  $\mu$ l).



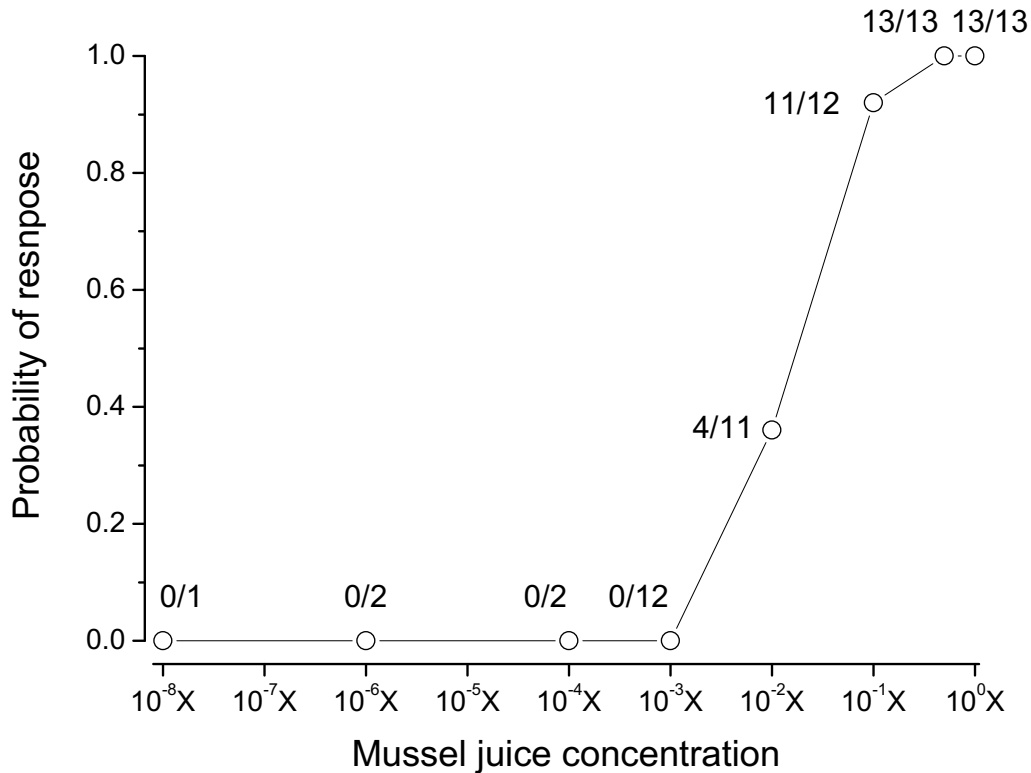

Fig. 4. Dose response curve of tentacle to mussel juice. The number over the symbol indicates actual number of tentacles that responded to mussel juice and the number of tentacle tested. No tentacles responded at or below  $10^{-3}$  times diluted mussel juice.

251

252 Tentacle response to undiluted mussel juice was the same as the response to food  
253 stimuli. The tentacle immediately started repetitive proximal contraction and relaxed  
254 when the perfusion solution was switched back to sea water. The probability of invoking  
255 a tentacle response was decreased by decreasing the concentration. Below a dilution of  
256  $10^{-3}$  no response is observed (Fig. 4). At a dilution of  $10^{-1}$  11 of 12 tentacles proximally  
257 contracted, but localized contraction was observed before the proximal contraction. At a  
258 dilution of  $10^{-2}$  4 of 12 tentacles proximally contracted after a localized contraction. This  
259 result suggests that chemical stimuli alone can induce a feeding response and it has a  
260 threshold between  $10^{-2}$  and  $10^{-3}$ .

261

262 Comparison between the initiation of the first contraction at the stimulated point to  
263 100 % mussel juice and the first measured electrical response recorded at the base of the  
264 tentacle allows for measurement of the signal delay. By adjusting the distance between  
the stimulation and observation points, the conduction velocity can be measured. The

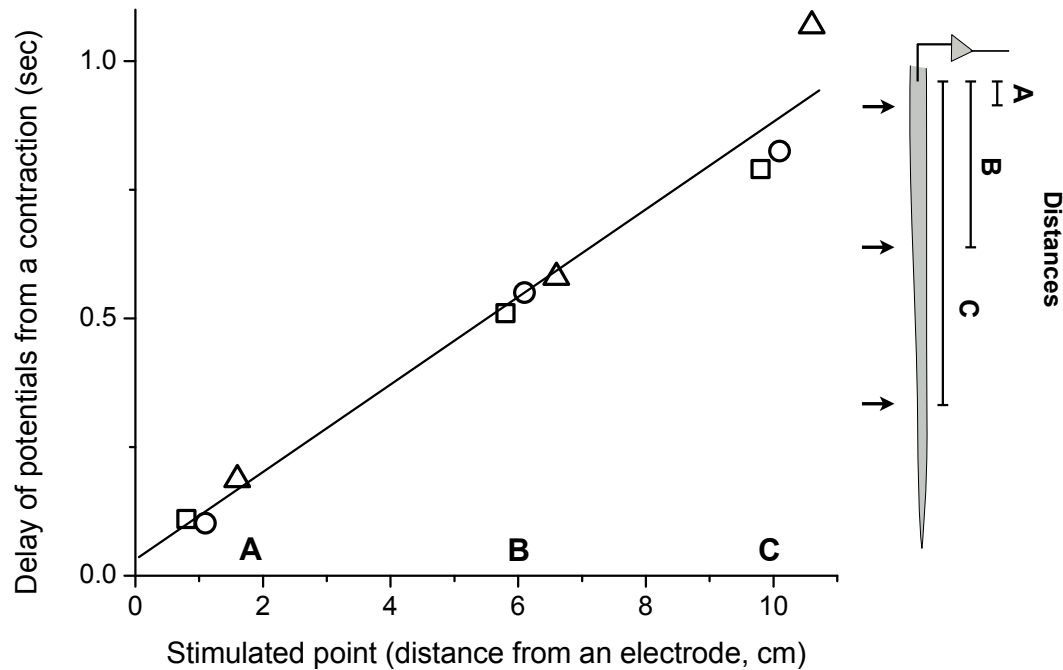

265

Fig. 5. Delays of the first action potentials following the first large contraction to mussel juice applied to three points on a tentacle (right). This was obtained from three tentacles, and each symbol shows individual tentacle. The delay increased linearly by increasing the distance, and the conduction velocity was 11 cm/sec.

266 delay was increased linearly with distance, yielding a conduction velocity of 11 cm/sec (Fig. 5).  
267 We also used nine amino acids, glutamic acid, glutathione, glutamine, proline, asparagine, valine,  
268 methylglutathione, aspartic acid, and cysteine with concentrations of  $10^{-2}$  M. In these amino  
269 acids, glutamic acid and glutathione could induce localized contraction. To investigate the detail  
270 of the responses to amino acids, we used  $10^{-1}$  to  $10^{-5}$  M glutamic acid and glutathione. No  
271 tentacles responded to these amino acids below  $10^{-3}$  M. Tentacles responded to these amino acids  
272 at concentrations higher than  $10^{-2}$  M with localized contraction. The response to glutathione was  
273 also localized contraction, but 3 of 6 tentacles proximally contracted to  $10^{-1}$  M solution similar to  
274 the response to mussel juice. This result demonstrates that a single amino acid can excite the  
275 chemical sensory system to induce the feeding response of tentacles.  
276

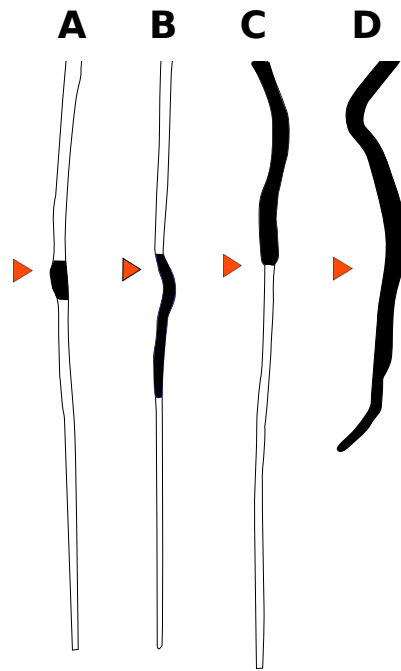

Fig. 6. Tentacle contraction patterns: localized (A), distal (B), proximal (C) and whole contractions (D) induced by slow (A), fast (B and C) and fast and repeating touching (D) with a glass rod, respectively. Red rectangles indicate the stimulated points on tentacles and contracted areas on tentacles shown as black areas.

#### 277 4. Mechanical stimuli induce a different response.

278 Feeding is initiated by touching prey and mechanical stimuli are expected to be  
279 important for generating feeding behavior. We used a 1mm diameter heat polished glass  
280 rod as a mechanical stimulus by careful touching the tip of the glass rod to an isolated  
281 tentacle.

282 Four types of response, which we termed localized, distal, proximal and full  
283 contractions, could be induced by touching (Fig. 6). All tentacles tested locally contracted  
284 in response to slow contact (such that the tentacle remained stationary) (Fig. 6A).  
285 Tentacles sometimes adhered to the glass rod suggesting that nematocytes were  
286 discharged in response to this stimulus. With stronger touching (such that the tentacle  
287 was swung away from the point of contact) or repeated touching, distal, proximal or  
288 whole contractions could be induced (Fig 6 B, C, and D). However, in no cases were  
289 repetitive proximal contractions observed, as seen during the feeding response. Compared  
290 to chemical stimuli, the mechanical stimulus duration is short, less than 1 sec, and this  
291 short duration might be the reason for the absence of a repeated contraction. Experiments  
292 were also performed with constant mechanical stimulation using a glass rod. This  
293 stimulation induced a localized contraction just after a glass rod touch, but there was  
294 immediate relaxation and no repetitive contractions were observed. These results indicate  
295 that mechanoreception is not solely responsible for generating the feeding response.

296  
297  
298  
299  
300

301 **5. Stretch stimulus induced repetitive proximal contraction**

302 Repetitive tentacle contraction was not induced by a single small prey, for  
303 example *Artemia*, but could be by the capture of larger prey or of multiple *Artemia* on the  
304 same tentacle. Therefore, there appears to be a response to tentacle stretching that is  
305 independent of the touch response. To address this sensory mechanism, we used a piece

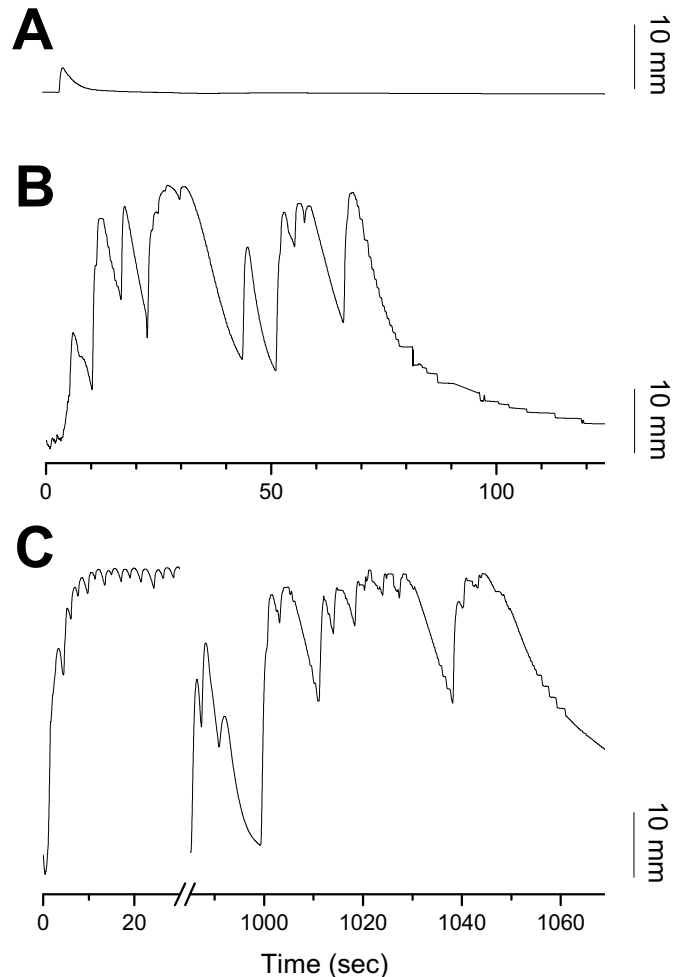

Fig. 7. Contraction patterns in response to paper and food stimuli on a tentacle. (A) Response to touch stimulus with a vertically suspended piece of paper. There is local contraction followed by immediate relaxation. (B) Response to a piece of paper attached directly to the tentacle. Repetitive proximal contraction was recorded. (C) Response to a piece of mussel shown in two elapsed time regions, 0 to 20 sec and 990 to 1070 sec at the same scale as in A and B. The tentacle repeated contraction with faster frequency and smaller amplitudes just after it was stimulated than the late repetitive contraction. This late response shows the same qualitative features found in attachment of paper.

306 of filter paper that is negatively buoyant and stretches the tentacle when attached, but  
307 does not contain any proteins or amino acids.

308 To control for the purely tactile response, we first investigated the influence of the  
309 paper by touching the tentacle at a fixed position, with the filter paper supported by a  
310 thread. The response to this stimulation was a localized contraction and immediate

311 relaxation (Fig. 7A), similar to the response to constant mechanical stimulus with a glass  
312 rod.

313 With mechanical stimulation, the filter paper would often become attached to the  
314 tentacle, likely through a nematocyte. To induce a stretch stimulus, the paper was  
315 released after attachment, causing it to sink due to gravity. After some strain of the  
316 tentacle, a repetitive proximal contraction was observed, originating from the contacted  
317 point (Fig. 7B). This response could be induced by attaching filter paper to any point on  
318 tentacle. Compared to the food response, the frequency of the contraction of the paper  
319 response was lower and the amplitude was bigger. Figure 7C shows the beginning and  
320 end of the response to a piece of mussel, with remarkable similarity between the late  
321 stage response to a food particle and the response to filter paper. This suggests that the  
322 food particle first stimulates the chemical and stretch responses, and only later does a  
323 stretch response induce repetitive contractions.

324 Like a chemical stimulus, the stretch stimulus induces a repetitive proximal  
325 contraction. The two stimuli have different regions of excitation, chemical stimuli being  
326 localized on the applied point while stretching occurs from the point of contact  
327 proximally to the fixed base of the tentacle. To address the directionality of this  
328 response, we performed stretch experiments with a gravitationally inverted tentacle. A  
329 paper stimulus placed on this inverted tentacle stretched it distally from the point of  
330 contact, rather than the usual proximal stretching. Even with this distal stimulus,  
331 repetitive proximal contractions were induced, suggesting that this directionality stems  
332 from the organism and not from the orientation relative to gravity.

333

## 334 Discussion

335 An intact scyphomedusa, *Sanderia malayensis*, keeps swinging tentacles by bell  
336 pulsations during it swims. Prey is captured on a tentacle and is brought to near the bell  
337 by a tentacle proximal contraction, and the tentacle then repeats contraction to keep the  
338 prey position near the bell until it transfers the prey to an oral arm. We found that isolated  
339 tentacles could produce this feeding response suggesting that this behavior would be  
340 generated with simple and primitive nerve nets in the tentacle. This study of *Sanderia*  
341 tentacle demonstrates that the isolated tentacle nerve net can discriminate between  
342 chemical and tactile stimuli and generate at least two different behavioral acts.

343 Contractions on an isolated tentacle could be initiated by mechanical, chemical and  
344 stretch stimuli, but these different stimuli led to different types of response. Since prey  
345 must be touched on a tentacle to induce feeding response, touching is considered to be  
346 one of the triggers of the response. However, mechanical stimuli did not induce the  
347 feeding response on tentacles. To a mechanical stimulus tentacle contracted locally,  
348 distally, proximally or whole length (Fig. 6). After these contractions, the tentacle relaxed  
349 immediately and did not repeat contraction. Horridge (Horridge 1955) reported a tentacle  
350 response to mechanical stimuli on a hydromedusa, *Geryonia proboscidalis*. Tentacles on  
351 an intact animal proximally contracted to a mechanical stimulus while an isolated tentacle  
352 contracted locally to gentle stimulus or the whole tentacle contracted to a strong stimulus.  
353 This indicates that the CNS of *Geryonia*, that consists of inner and outer nerve rings in  
354 the bell, strongly innervate tentacular nervous system. However, in scyphomedusa that  
355 does not have such CNS (Satterlie 2011), intact *Sanderia* exhibited variety of temporal  
356 responses by mechanical stimuli those are the same to the responses of isolated tentacles.

357 This result suggests that tentacular nervous system of *Sanderia* is not strongly innervated  
358 by nerve nets in the bell. This variety of temporal responses of tentacles by mechanical  
359 stimulation might function to allow escape from predators or to reject non-food objects,  
360 but not trigger the feeding response.

361 In cnidarians, chemical stimuli are well known as feeding response activators and a  
362 specific amino acid works to induce a specific step of feeding behavior in some species.  
363 In sea anemone, for example, proline triggers a food capture response while glutathione  
364 triggers ingestion (Lindstedt 1971). In scyphomedusa, polyps of *Chrysaora* exhibit  
365 feeding behaviors in response to various amino acids and peptides, and a specific feeding  
366 step for each amino acid such as contraction or writhing was also observed in excised  
367 tentacles (Loeb and Blanquet 1973). For a *Sanderia* medusa tentacle, filtered mussel juice  
368 and nine amino acids were used to investigate the roles of chemosensory system on the  
369 feeding response. The mussel juice induced repetitive proximal contraction, but very high  
370 concentration, more than 1 % is required. Glutamic acid and glutathione induced a  
371 localized contraction to  $10^{-2}$  M amino acids. To  $10^{-1}$  M of glutamic acid only localized  
372 contraction was produced, while  $10^{-1}$  M of glutathione produced proximal contractions in  
373 addition to a localized contraction on 3 of 6 tentacles. This low sensitivity to chemical  
374 stimulus might be useful to avoid responding to a bleeding prey located too far from the  
375 tentacle, but responses of the chemosensory system on a tentacle can trigger the feeding  
376 response with strong stimuli.

377 Because a few *Artemia* captured on a tentacle did not evoke a tentacle contraction  
378 but larger prey was able to, it is considered that tension on a tentacle would be required.  
379 Our paper stimulus induced repetitive proximal contraction from the stimulated point  
380 when allowed to stretch the tentacle, while touching with a fixed paper only caused a  
381 temporal localized contraction. These results indicate that a stretch receptor is a trigger  
382 and a modulator of the feeding response allowing it to persist until the prey is transferred  
383 to the oral arm. Unlike chemical and mechanical stimuli, which are applied on a  
384 stimulated point of the tentacle, tension in the tentacle is usually present proximally from  
385 the point of attachment. Despite this broad area of stimulation, the response of the  
386 tentacle seems to be initiated at the point of contraction and proceed proximally, even if  
387 the stimulus has been applied distally by inverting the tentacle. How stretch receptors  
388 located on the proximal or distal stimulated area is unclear, and to investigate the  
389 mechanism more detailed experiments are required.

390 Rhythmic contraction could be evoked on any part of tentacle through the  
391 application of a food, stimulus, or stretch stimuli. This rhythmic contraction arises from  
392 interplay between prey weight continuously pulling the tentacle down while muscle  
393 response intermittently moves the food back up. Removing the stimulus results in  
394 cessation of rhythmic contraction, indicating the necessity of continuous chemical or  
395 stretch stimuli to induce repeated contraction. As the tentacle habituated to the stimulus,  
396 the frequency of contraction decreased, but this decreased frequency was accompanied by  
397 increased amplitude to ensure the food was raised to its previous location (Fig 2 and 7C) .  
398 To generate rhythmic patterns, medusa has rhopalia on the bell edge contains a  
399 pacemaker that initiates a bell contraction and the rate of firing of individual rhopalian  
400 pacemaker is variable and can be directly influenced by sensory inputs, which  
401 presumably modify a baseline discharge rate of the pacemaker (Romanes 1885, Horridge  
402 1956, Passano and McCullough 1965, Passano 1973). However, such rhoparium like

403 organs have not been found on the tentacle, and our results indicate that the rhythmic  
404 pattern is generated in the tentacle. The response duration of the preparation contained  
405 tentacular nerve ring was significantly longer than preparations those did not contain the  
406 tentacular nerve ring (Fig. 3), but the response pattern was the same, repetitive intrinsic  
407 proximal contraction of which the tentacular nerve ring could be an extrinsic modulator.  
408 The cellular nature of the pacemakers of tentacle nerve nets are not known, but the  
409 sensory signals would be integrated at interneurons which must be located along the  
410 tentacle, and the firing rate would be modified by sensory input levels from both  
411 chemical and stretch receptors.

412 Responses to chemical and stretch stimuli signals were always conducted  
413 proximally, suggesting these responses are connected to a proximally conducting  
414 network. This is different from mechanical stimuli that could induce a response in both  
415 directions suggesting that existence of two nervous systems in the tentacle. The bell  
416 contains two nerve nets, a motor nerve net (MNN) and a diffuse nerve net (DNN), both of  
417 which consist of bidirectional synapses between neurons (Horridge and Mackay 1962,  
418 Horridge, Chapman et al. 1962). In analogy to the bell nervous system, there might be  
419 two nerve nets on the tentacle: one for feeding response and polarized to conduct  
420 proximally (feeding nerve net) and one for escape or rejection behaviors which conducts  
421 either direction depending on stimulus conditions (withdrawal nerve net). The feeding  
422 nerve net would be comparable to MNN that innervate muscles directly and the  
423 withdrawal nerve net is similar to the DNN that modulates muscle activities (Romanes  
424 1885, Horridge 1956, Passano and McCullough 1965, Passano 1973). However, the bell  
425 MNN is not polarized to conduct signals (Anderson 1985, Anderson and Spencer 1989),  
426 and this is a major difference between the proposed polarized feeding nerve net and the  
427 MNN. This suggests that the feeding nerve net would have polarized synaptic  
428 projections, however, more detailed histological and physiological information on the  
429 tentacle nervous system are required.

430 From the perspective of function, it makes sense that stimuli distinctly associated  
431 with food, those of chemical and stretch detection, produce different responses than touch  
432 stimuli associated with both food and predation. The rapid withdrawal behavior  
433 associated with full distal and proximal contraction is distinctly different than the  
434 repeating and more sustained feeding behavior of raising capture prey for transfer to the  
435 oral arms. On our preliminary experiments, an isolated oral arm could also be induced a  
436 feeding response by a food particle suggesting that the feeding behavior of the oral arm is  
437 also generated by endogenous nervous activities. These results suggest that the feeding  
438 response of *Sanderia* medusa consists of two endogenous processing systems located in a  
439 tentacle and an oral arm system coordinated through nerve nets in the bell.

440

#### 441 **Acknowledgements**

442 We thank Martin Poitsch for support and valuable feedback.

443

444 **Competing interests:** The authors declare no competing or financial interests.

445

#### 446 **Author contributions**

447 Conceptualization: K.M., M.S., J.A.; Methodology: K.M., J.A.; Formal analysis: K.M., M.S.,  
448 J.A.; Investigation: K.M., M.S.; Resources: J.A.; Writing - original draft: K.M., M.S.; Writing -

449 review & editing: K.M., M.S., J.A.; Supervision: J.A.; Project administration: J.A.; Funding  
450 acquisition: J.A.

451

## 452 **Funding**

453 Supported by Schlumberger-Doll Research, Cambridge, MA.

454

## 455 **References**

456

457 Anderson, P. A. (1985). "Physiology of a bidirectional, excitatory, chemical synapse." Journal of  
458 neurophysiology **53**(3): 821-835.

459 Anderson, P. A., A. Moosler and C. J. Grimmelikhuijzen (1992). "The presence and distribution of Antho-  
460 RFamide-like material in scyphomedusae." Cell and tissue research **267**(1): 67-74.

461 Anderson, P. A. and A. N. Spencer (1989). "The importance of cnidarian synapses for neurobiology."  
462 Journal of Neurobiology **20**(5): 435-457.

463 Arai, M. N. (1992). "Active and passive factors affecting aggregations of hydromedusae: A review."  
464 Scientia Marina **56**(2-3): 99-108.

465 Burnett, J. and J. Sutton (1969). "The Fine Structural Organization of the Sea Nettle Fishing Tentacle." J.  
466 Exp. Zool(335-348).

467 Dupre, C. and R. Yuste (2017). "Non-overlapping Neural Networks in *Hydra vulgaris*." Current Biology  
468 **27**(8): 1085-1097.

469 Ewer, R. F. and H. Munro Fox (1947). On the Functions and Mode of Action of the Nematocysts of  
470 Hydra. Proceedings of the Zoological Society of London, Wiley Online Library.

471 Garm, A., P. Ekstrom, M. Boudes and D. E. Nilsson (2006). "Rhopalia are integrated parts of the central  
472 nervous system in box jellyfish." Cell and Tissue Research **235**(2): 333-343.

473 Garm, A., M. O'Connor, L. Parkefeld and D.-E. Nilsson (2007). "Visually guided obstacle avoidance in the  
474 box jellyfish *Tripedalia cystophora* and *Chiropsella bronzie*." Journal of Experimental Biology **210**(20):  
475 3616-3623.

476 Hargitt, G. (1910). "Studies in the Development of Scyphomedusae." Journal of Morphology **21**(2): 217-  
477 262.

478 Haug, G. (1933). "Die Lichtreaktionen der Hydren *Chlorohydra viridissima* u. *Pelmatohydra oligactis* P.  
479 *typica*." Z Verg. Physiol **19**: 246-303.

480 Hedrick, T. L. (2008). "Software techniques for two-and three-dimensional kinematic measurements of  
481 biological and biomimetic systems." Bioinspiration & biomimetics **3**(3): 034001.

482 Horridge, A. (1953). "An action potential from the motor nerves of the jellyfish *Aurellia aurita* Lamarck."  
483 Nature **171**(4348): 400-400.

484 Horridge, G. (1954). "The nerves and muscles of medusae. I. Conduction In The Nervous System Of  
485 *Aurellia Aurita Lamarck*." Journal of experimental Biology **31**(4): 594-600.

486 Horridge, G. (1955). "The nerves and muscles of medusae. II. *Geryonia Proboscidalis* Eschscholtz."  
487 Journal of experimental Biology **32**(3): 555-568.

488 Horridge, G. (1956). "The nerves and muscles of medusae. V. Double Innervation In Scyphozoa." Journal  
489 of experimental Biology **33**(2): 366-383.

490 Horridge, G. (1959). "The Nerves and Muscles of Medusae. VI. The Rhythm." Journal of experimental  
491 Biology **36**: 72-91.

492 Horridge, G. and B. Mackay (1962). "Naked axons and symmetrical synapses in coelenterates." Journal of  
493 Cell Science **3**(64): 531-541.

494 Horridge, G. A., D. Chapman and B. Mackay (1962). "Naked axons and symmetrical synapses in an  
495 elementary nervous system." Nature **193**(4818): 899-900.

496 Larson, R. J. (1986). "The feeding and growth of the sea nettle, *Chrysaora quinquecirrha* (Desor), in the  
497 laboratory." Estuaries **9**(4): 376.

498 Lasker, H. R., J. A. Syron and W. S. Clayton Jr (1982). "The feeding response of *Hydra viridis*: effects of  
499 prey density on capture rates." The Biological Bulletin **162**(3): 290-298.

500 Lindstedt, K. J. (1971). "Biphasic feeding response in a sea anemone: control by asparagine and  
501 glutathione." Science **173**(3994): 333-334.

502 Loeb, M. J. and R. S. Blanquet (1973). "Feeding behavior in polyps of the Chesapeake Bay sea nettle,  
503 *Chrysaora quinquecirrha* (Desor, 1848)." The Biological Bulletin **145**(1): 150-158.



- 504 Mackie, G., R. M. Marx and R. Meech (2003). "Central circuitry in the jellyfish *Aglantha digitale* IV.  
505 Pathways coordinating feeding behaviour." *The Journal of Experimental Biology* **206**: 2487-2505.
- 506 Mackie, G. and R. Meech (1995). "Central circuitry in the jellyfish *Aglantha*. I: The relay system." *The*  
507 *Journal of Experimental Biology* **198**(Pt 11): 2261-2270.
- 508 Mackie, G. and R. Meech (1995). "Central circuitry in the jellyfish *Aglantha*. II: The ring giant and carrier  
509 systems." *Journal of Experimental Biology* **198**(11): 2271-2278.
- 510 Mackie, G. O. and R. W. Meech (1985). "Separate sodium and calcium spikes in the same axon." *Nature*  
511 *(London)* **313**(6005): 791-793.
- 512 Mackie, G. O. and R. W. Meech (2000). "Central circuitry in the jellyfish *Aglantha digitale*. III. The  
513 rootlet and pacemaker systems." *The Journal of Experimental Biology* **203**(Pt 12): 1797-1807.
- 514 Martin, V. J. (2002). "Photoreceptors of cnidarians." *Canadian Journal of Zoology* **80**(10): 1703-1722.
- 515 Nakanishi, N., V. Hartenstein and D. K. Jacobs (2009). "Development of the rhopalial nervous system in  
516 *Aurelia* sp. 1 (Cnidaria, Scyphozoa)." *Development genes and evolution* **219**(6): 301-317.
- 517 Pantin, C. and M. V. Dias (1952). "Rhythm and afterdischarge in medusae." *Anais da Academia Brasileira*  
518 *de Ciências* **24**(4): 351-364.
- 519 Passano, L. (1965). "Pacemakers and activity patterns in medusae: homage to Romanes." *American*  
520 *zoologist* **5**(3): 465-481.
- 521 Passano, L. (1973). "Behavioral control systems in medusae; a comparison between hydro-and  
522 scyphomedusae." *Publications Of The Seto Marine Biological Laboratory* **20**: 615-645.
- 523 Passano, L. and C. McCullough (1963). "Pacemaker hierarchies controlling the behaviour of hydras." *Nature*  
524 **199**: 1174-1175.
- 525 Passano, L. and C. McCullough (1965). "Co-ordinating Systems and Behaviour in Hydra II. The  
526 Rhythmic Potential System." *Journal of Experimental Biology* **42**(2): 205-231.
- 527 Passano, L. M. (2003). "Pacemakers And Activity Patterns In Medusae: Homage To Romanes." *Integrative and Comparative Biology*.  
528
- 529 Perkins, F. O., R. W. Ramsey and S. F. Street (1971). "The ultrastructure of fishing tentacle muscle in the  
530 jellyfish *Chrysaora quinquecirrha*: a comparison of contracted and relaxed states." *Journal of*  
531 *ultrastructure research* **35**(5-6): 431-450.
- 532 Romanes, G. J. (1880). "The New Freshwater Jelly Fish: Physiology of the Freshwater Medusa." *Nature*  
533 **22**: 179-181.
- 534 Romanes, G. J. (1885). *Jelly-fish, star-fish, and sea urchins: Being a research on primitive nervous*  
535 *systems*. New York, NY, Appleton & Co.
- 536 Satterlie, R. A. (2011). "Do jellyfish have central nervous systems?" *Journal of Experimental Biology*  
537 **214**(8): 1215-1223.
- 538 Schafer, E. A. (1878). "Observations on the nervous system of *Aurelia aurita*." *Philosophical Transactions*  
539 *of the Royal Society of London* **169**: 563-575.
- 540 Trembley, A. (1744). *Mémoires pour servir à l'histoire d'un genre de polypes d'eau douce, à bras en forme*  
541 *de cornes*. Par A. Trembley, chez Jean & Herman Verbeek.
- 542
